# Supplementary material for: Oncolytic HSV–Infected Glioma Cells Activate NOTCH in Adjacent Tumor Cells Sensitizing Tumors to Gamma Secretase Inhibition
Source: Oxford University Press journal article supplement (doi:10.1158/1078-0432.ccr-19-3420), 2020-03-05
Supplement: 10780432ccr193420-sup-230940_2_supp_6067009_q553jv.xlsx [file 10780432ccr193420-sup-230940_2_supp_6067009_q553jv.xlsx]

## Sheet: Supplementary table1
Supplementary Table 1. Cell lines and viruses
Resource	Source	Identifier	Name of Core doing STRS profiling
Cell lines
GBM30	Ohio State University	N/A
GBM12, 28, and 43	Mayo Clinic	N/A
GSC2, 8-11, 11, 20, and 23	The University of Texas MD Anderson Cancer Center	N/A
LN229, U251, U87ΔEGFR	Emory University	N/A
Vero	ATCC	CCL-81
Viruses
Wild type Human Herpesvirus 1 (strain F)	ATCC	VR-733
rHSVQ	Yoo et al., 2012	N/A
34.5 ENVE	Yoo et al., 2012	N/A
All cells were STRS profiled and maintained at passage less than 50 after STRS profiling.

## Sheet: Supplementary table2
Supplementary Table 2. Antibodies
Resource	Source	Identifier	Dilution
Western blotting
Anti-β-tubulin	Abcam	ab6046	1:1000
Anti-Cleaved Notch1	Cell Signaling Technology	4147S	1:1000
Anti-DLL4	Cell Signaling Technology	2589S	1:1000
Anti-FIH-1	Novus Biologicals	NB100-428	1:1000
Anti-GAPDH	Abcam	ab9484	1:1000
Anti-mouse IgG, HRP-linked	Cell Signaling Technology	7076S	1:2000
Anti-rabbit IgG, HRP-linked	Cell Signaling Technology	7074S	1:2000
Immunofluorescence and immunohistochemistory
Anti-activated NOTCH1	Abcam	ab8925	1:100
Anti-cleaved caspase3	Cell Signaling Technology	9661S	1:250
Anti-HLA Class1	Abcam	ab70328	1:100
Anti-HSV-1	Abcam	ab9533	1:100
Anti-Ki-67	Abcam	ab16667	1:100
Anti-mouse IgG, Alexa Fluor 488 conjugate	Cell Signaling Technology	4408S	1:250
Anti-rabbit IgG, Alexa Fluor 594 conjugate	Cell Signaling Technology	8889S	1:250
Flow cytometry
Anti-Ki-67, PE	Invitrogen	12569880	1:200
Anti-rat IgG2a kappa isotype control, PE	Invitrogen	12432180	1:200
Ubiquitylation assay
anti-GFP	Invitrogen	A11120	1:200

## Sheet: Supplementary table3
Supplementary Table 3. Primer sequences for qRT-PCR
Gene	Type	Sequence
JAG1	Forward	5'-TTCAGGACCCAACTGTGAAA-3'
	Reverse	5'-ACAGCTGCCTCTGTTGTGAC-3'
JAG2	Forward	5'-TCTGCCTTGCTACAATGGTG-3'
	Reverse	5'-GCGATACCCGTTGATCTCAT-3'
DLL1	Forward	5'-CCAGGGTTGCACACTTTCTC-3'
	Reverse	5'-CTACTACGGAGAGGGCTGCT-3'
DLL4	Forward	5'-GCGGGGTACCTTCTCGCTCATCATC-3'
	Reverse	5'-GCCTCCCCAGCCCTCATCACAAGTA-3'
Hey1	Forward	5'-CGAGGTGGAGAAGGAGAGTG-3'
	Reverse	5'-CTGGGTACCAGCCTTCTCAG-3'
Hey2	Forward	5'-TGGGGAGCGAGAACAATTAC-3'
	Reverse	5'-ATGAAGTCCATGGCAAGAGC-3'
HeyL	Forward	5'-CAGGATTCTTTGATGCCCGAG-3'
	Reverse	5'-GACAGGGCTGGGCACTCTTC-3'
Hes1	Forward	5'-GGCCAGTTTGCTTTCCTCAT-3'
	Reverse	5'-TTTAGAGTCCGGAGGGAAGA-3'
Hes4	Forward	5'-ACGCCCTCAGAAAAGAGAGC-3'
	Reverse	5'-TGCTACAGTCTCGGCAAAGG-3"
GAPDH	Forward	5'-GGAGTCAACGGATTTGGTCG-3'
	Reverse	5'-GGAATCATATTGGAACATGTAAACC-3'

## Sheet: Supplementary table4
Supplementary Table 4. Primer sequences for FIH-1 3’UTR assay
Gene	Type	Sequence
FIH-1 3'UTR	Forward	5’-ATACGAGAATTCCCTGCCAGGGGTCAAGGCC-3’
	Reverse	5’- GTATATGAATTCGTGTAAAAGCTTAGGAT -3’
FIH-1 3'UTR mutant #1	Forward	5'-CTGCCAGGGGTCAAGGCGAGGAGCCAGGTGACTGCTATCCC-3'
	Reverse	5'-GGGATAGCAGTCACCTGGCTCCTCGCCTTGACCCCTGGCAG-3'
FIH-1 3'UTR mutant #2	Forward	5'-GGGGTCAAGGCCTGCCAGGTGACTG-3'
	Reverse	5'-CAGTCACCTGGCAGGCCTTGACCCC-3'

## Sheet: Supplementary table5
Supplementary Table 5. RPPA of U251T3 cells transfected with negative control or HSV-1 miRNA-H16
protein	p value	log2FC	adjusted p value
HSP27_pS82-R-V	1.69e-05	0.360432	0.00486871
NDRG1_pT346-R-V	8.11e-05	0.480098	0.00778676
TFRC-R-V	7.2e-05	-0.781935	0.00778676
Bax-R-V	0.000161348	-0.203818	0.00985505
Coup-TFII-R-C	0.00034218	-0.593022	0.00985505
Cyclophilin-F-M-V	0.000303752	-0.235615	0.00985505
IGFRb-R-C	0.000251309	-0.36638	0.00985505
Pdcd4-R-C	0.000196442	-0.473813	0.00985505
S6_pS240_S244-R-V	0.000254713	-0.571074	0.00985505
Stat3-R-C	0.000342189	-1.01495	0.00985505
IGFBP5-G-C	0.000388602	0.197658	0.0101743
Tuberin-R-V	0.000465457	-0.318012	0.011171
ERCC5-R-C	0.00054326	0.35499	0.0111756
Mcl-1-R-V	0.00051326	0.606707	0.0111756
IGFBP2-R-V	0.000704662	0.733536	0.0135295
c-Jun_pS73-R-V	0.00111048	0.144307	0.0195122
Notch1-R-V	0.00115176	0.300721	0.0195122
Axl-R-V	0.00177118	-1.06413	0.0263008
S6_pS235_S236-R-V	0.00191777	-0.666294	0.0263008
TIGAR-R-V	0.00170488	-0.121904	0.0263008
TWIST-M-C	0.00186922	0.118026	0.0263008
PDGFR-b-R-V	0.00223535	0.471895	0.0292627
PDK1_pS241-R-V	0.00242884	0.247993	0.0304133
EGFR_pY1173-R-V	0.00256227	-0.033428	0.0307472
MDM2_pS166-R-V	0.00277865	-0.282332	0.0307789
Merlin-R-C	0.0026978	-0.850293	0.0307789
B-Raf_pS445-R-V	0.00334151	0.243688	0.0356428
EMA-M-C	0.00355402	0.234918	0.0365557
Glutamate-D1-2-R-C	0.00412858	0.0969548	0.0405725
VHL-EPPK1-M-E	0.0042263	0.34956	0.0405725
p90RSK_pT573-R-C	0.00448943	0.163774	0.0417082
ATM-R-V	0.00489951	-0.339853	0.0427593
MCT4-R-V	0.00475875	0.642051	0.0427593
SCD-M-V	0.00577132	0.179873	0.0488864
Src-M-V	0.00595342	0.210395	0.0489881
PKC-delta_pS664-R-V	0.00632344	-0.102326	0.0505875
CD171-M-V	0.00681775	0.470066	0.0530679
Chk1_pS296-R-V	0.00724495	-0.105887	0.0549091
Caspase-7-cleaved-R-C	0.00856032	-0.257938	0.0616343
PMS2-R-V	0.00842022	-0.476151	0.0616343
GSK-3a-b-M-V	0.0089478	-0.104248	0.0628529
Bim-R-V	0.0111865	0.263884	0.0745794
c-Met_pY1234_Y1235-R-V	0.0113941	-0.0911161	0.0745794
Myosin-IIa_pS1943-R-V	0.0113456	-0.637232	0.0745794
Hif-1-alpha-M-C	0.0118296	0.155443	0.0757092
CD29-M-V	0.0124366	0.11254	0.0762075
HES1-R-V	0.0122604	-0.393016	0.0762075
b-Catenin-R-V	0.0139893	-0.191263	0.0774794
p70-S6K_pT389-R-V	0.0137069	-0.13608	0.0774794
PI3K-p85-R-V	0.0139782	-0.188227	0.0774794
Raptor-R-V	0.0133276	0.088845	0.0774794
Src_pY527-R-V	0.0130732	-0.438572	0.0774794
AMPKa-R-C	0.014924	-0.254617	0.0803369
Cyclin-B1-R-V	0.0160965	0.457596	0.0803369
GCN5L2-R-V	0.0155595	-0.225125	0.0803369
mTOR_pS2448-R-C	0.016179	-0.181104	0.0803369
PKA-a-R-V	0.0161277	-0.246253	0.0803369
PKC-a-M-V	0.0156087	-0.149429	0.0803369
Smad4-M-V	0.0183519	0.159264	0.0895822
PAI-1-M-V	0.0210186	0.583407	0.0992355
Stat3_pY705-R-V	0.0207248	-0.308151	0.0992355
Tyro3-R-V	0.0213963	0.12898	0.0993893
MIG6-M-V	0.0234394	0.116606	0.107152
Connexin-43-R-C	0.0248215	-0.263758	0.111697
AR-R-V	0.0265486	-0.0725659	0.115848
B7-H4-R-C	0.0261614	0.243038	0.115848
TAZ-R-V	0.0278598	0.0707832	0.119756
MEK1_pS217_S221-R-V	0.0295829	0.0672903	0.123202
MIF-R-C	0.0299449	0.0541071	0.123202
p73-M-N	0.0291252	0.0836567	0.123202
Pdcd-1L1-G-C	0.0337931	0.10659	0.137076
EGFR-R-V	0.0349791	0.158101	0.138
p38_pT180_Y182-R-V	0.0346721	0.138581	0.138
Rictor_pT1135-R-V	0.0364907	-0.0893839	0.142018
Bcl2-M-V	0.0377996	0.159301	0.145151
Atg3-R-V	0.0394202	0.0657923	0.145551
Bcl2A1-R-V	0.0387538	-0.0670093	0.145551
SDHA-R-V	0.039404	0.152362	0.145551
Shc_pY317-R-V	0.040156	-0.260468	0.146392
CD49b-M-V	0.0413898	0.109184	0.149003
Bak-R-C	0.0443946	0.0463267	0.157847
Annexin-VII-M-V	0.049802	0.0717967	0.174914
4E-BP1_pT37_T46-R-V	0.0532444	0.18035	0.184752
HER2-M-V	0.056132	0.171932	0.190188
Jagged1-R-V	0.0560118	0.157078	0.190188
CDK1-R-C	0.058353	0.132351	0.195415
Ubq-Histone-H2B-M-C	0.0608267	0.0746425	0.201357
PCNA-M-C	0.0619276	-0.0400165	0.202672
IRS1-R-V	0.0654174	-0.0267584	0.209336
PDK1-R-V	0.0653491	0.022518	0.209336
ACVRL1-R-C	0.0712202	0.0788504	0.222952
E2F1-M-V	0.0740932	0.0914165	0.222952
eIF4E-R-V	0.0746259	-0.176817	0.222952
FRA-1-R-C	0.0743079	0.0636285	0.222952
HER2_pY1248-R-C	0.0722661	0.0994662	0.222952
PRAS40-M-C	0.0750914	0.10666	0.222952
XPF-M-C	0.0718267	-0.122295	0.222952
Dvl3-R-V	0.0769538	-0.0906735	0.223866
PKM2-R-N	0.0767982	-0.139512	0.223866
PI3K-p110-a-R-C	0.0817343	-0.119598	0.235395
eEF2K-R-V	0.0847289	0.102637	0.241603
14-3-3-beta-R-V	0.0880318	-0.0258917	0.247759
C-Raf-R-C	0.0892095	-0.129379	0.247759
Gys-R-V	0.0894965	-0.189569	0.247759
Stat5a-R-V	0.0903289	-0.355272	0.247759
H2AX_pS140-M-C	0.0922859	0.0914431	0.250739
Hexokinase-II-R-V	0.0949816	0.0864358	0.254849
VEGFR-2-R-V	0.0955684	0.0499945	0.254849
Atg7-R-V	0.0975779	-0.0513227	0.256607
PKC-a_pS657-R-C	0.0980098	-0.202371	0.256607
c-Abl-R-V	0.104503	-0.0832087	0.266722
Gab2-R-V	0.105578	-0.185411	0.266722
Mitochondria-M-V	0.10526	0.135119	0.266722
Stathmin-1-R-V	0.105029	-0.030686	0.266722
Chk2_pT68-R-C	0.110005	0.0595719	0.26703
Complex-II-Subunit-M-V	0.109452	0.274413	0.26703
FoxM1-R-V	0.107549	0.0455748	0.26703
PKM2-R-C	0.110335	-0.161408	0.26703
Sox2-R-V	0.108882	0.14051	0.26703
MEK2-R-V	0.115386	0.078153	0.276927
Chk1-M-C	0.118182	-0.058838	0.278988
FAK_pY397-R-V	0.117996	0.118207	0.278988
4E-BP1-R-V	0.12333	-0.307912	0.281896
EGFR_pY1068-R-C	0.12197	0.150422	0.281896
FoxO3a_pS318_S321-R-C	0.12141	-0.043938	0.281896
NAPSIN-A-R-C	0.122647	-0.0688661	0.281896
TIF1-beta-R-N	0.127303	-0.0842034	0.288687
Smac-M-Q	0.129497	0.179591	0.291368
CD26-R-V	0.134513	0.105258	0.295722
Notch3-R-C	0.133339	0.0793177	0.295722
p70-S6K1-R-V	0.13407	0.0776042	0.295722
Bcl-xL-R-V	0.138633	-0.0644681	0.302472
JAB1-M-C	0.142032	0.0933223	0.307558
ACC1-R-C	0.144473	-0.32018	0.310508
AMPKa_pT172-R-C	0.148707	-0.363446	0.314909
MSH2-M-V	0.147892	0.0668643	0.314909
p21-R-V	0.150488	-0.0953809	0.316354
XBP-1-G-C	0.152579	0.0408808	0.318425
IRF-1-R-C	0.153709	-0.063146	0.318477
PD-L1-R-C	0.156525	0.0617122	0.321994
Fibronectin-R-V	0.163901	0.114176	0.334776
D-a-Tubulin-R-V	0.167785	0.0539503	0.340296
mTOR-R-V	0.173777	-0.0787182	0.349985
MSH6-R-C	0.17995	-0.0503083	0.357036
Myosin-11-R-V	0.180998	-0.0652195	0.357036
Porin-M-V	0.17905	-0.110484	0.357036
p27_pT157-R-C	0.184709	0.0364138	0.36188
BRD4-R-V	0.190376	0.163566	0.367975
N-Cadherin-R-V	0.189543	-0.0763344	0.367975
eIF4G-R-C	0.195338	-0.128695	0.373078
Rad50-M-V	0.195607	-0.0882606	0.373078
XIAP-R-C	0.198864	0.0783737	0.376794
GSK-3a-b_pS21_S9-R-V	0.200599	0.086759	0.377598
HSP27-M-C	0.203308	0.034323	0.37891
p38-MAPK-R-V	0.207874	0.143109	0.37891
Rheb-M-C	0.204804	-0.0594835	0.37891
UBAC1-R-V	0.20684	-0.0744577	0.37891
XPA-M-V	0.20556	0.0360453	0.37891
PAR-R-C	0.21172	0.356071	0.383493
Chk2-M-V	0.213507	0.0626754	0.384312
PKM1-R-N	0.218143	0.0847025	0.390219
PLC-gamma2_pY759-R-C	0.223145	0.0589403	0.396703
Cox-IV-M-C	0.228304	0.0326108	0.40103
GPBB-R-V	0.229729	0.0965215	0.40103
p53-R-C	0.229757	-0.0855541	0.40103
LINE-1-R-N	0.232743	0.148672	0.403795
Caveolin-1-R-V	0.240635	-0.153317	0.414987
PEA-15_pS116-R-V	0.252965	0.0570304	0.433654
YB1_pS102-R-V	0.254672	0.0417213	0.433997
b-Catenin_pT41_S45-R-V	0.257763	-0.038984	0.435654
c-Myc-R-C	0.25867	-0.0583135	0.435654
DUSP4-R-V	0.261811	0.101702	0.438382
PLK1-R-C	0.265127	0.155626	0.441367
UGT1A-M-V	0.28365	0.0367213	0.466807
YAP-R-E	0.282914	0.040612	0.466807
PKC-b-II_pS660-R-V	0.289692	0.056113	0.474042
ARID1A-R-C	0.291452	0.0910024	0.474228
PI3K-p110-b-M-C	0.295488	0.0304447	0.478093
Claudin-7-R-V	0.300894	-0.148562	0.481389
RBM15-R-V	0.302539	0.125756	0.481389
TIF1-beta_pS824-R-N	0.300117	0.0895156	0.481389
Rock-1-R-C	0.323269	-0.0350382	0.511546
Chk1_pS345-R-C	0.327818	-0.3665	0.514056
Cox2-R-C	0.328425	-0.0897252	0.514056
YB1-R-V	0.342485	-0.0321685	0.533166
c-Kit-R-V	0.34924	-0.0108667	0.540759
Smad1-R-V	0.351138	-0.380454	0.54079
DM-Histone-H3-R-V	0.354531	-0.0264358	0.543111
FoxO3a-R-C	0.359765	0.0588453	0.548214
Akt_pT308-R-V	0.364787	-0.0639787	0.550045
TTF1-R-V	0.364065	0.025065	0.550045
C-Raf_pS338-R-V	0.367219	0.00837689	0.550829
ATM_pS1981-R-V	0.370709	-0.0419811	0.553183
Gys_pS641-R-V	0.379366	-0.073901	0.560295
Rictor-R-C	0.3787	-0.060034	0.560295
p27_pT198-R-V	0.382857	-0.192191	0.562566
Heregulin-R-V	0.385578	-0.39829	0.563687
INPP4b-R-V	0.39098	0.0585426	0.568164
P-Cadherin-R-C	0.394249	0.0411991	0.568164
XRCC1-R-C	0.394558	-0.302201	0.568164
N-Ras-M-V	0.399527	0.0281075	0.572457
Annexin-I-M-V	0.402715	-0.0357953	0.574169
PTEN-R-V	0.414853	0.125873	0.58856
ER-R-V	0.428066	0.0776169	0.604328
p27-Kip-1-R-V	0.431937	-1.56983	0.606818
eEF2-R-C	0.435194	-0.076544	0.608427
Transglutaminase-M-V	0.437928	0.0399533	0.609292
PYGM-M-C	0.4404	-0.035549	0.609785
MEK1-R-V	0.453773	0.0514307	0.622317
p16INK4a-R-V	0.452919	0.0495502	0.622317
ARHI-M-C	0.456914	-0.00787732	0.623655
Puma-R-C	0.463794	-0.0399224	0.63006
SF2-M-V	0.467839	0.0337323	0.632571
LDHA-R-C	0.472476	0.0351609	0.635855
DJ1-R-V	0.484377	-0.331892	0.64286
HIAP-2-R-C	0.480438	-0.368482	0.64286
JNK_pT183_Y185-R-V	0.483291	-0.254003	0.64286
MDM2_pS395-R-N	0.492995	0.616568	0.651296
Caspase-3-R-C	0.50357	0.056907	0.662229
PREX1-R-V	0.518326	-0.0647838	0.678536
TSC1-R-C	0.528126	-0.0411462	0.688236
Akt-R-V	0.537646	0.0515942	0.688998
B-Raf-R-V	0.532282	0.0147047	0.688998
Di-Tri-M-Hist-H3-M-N	0.53828	0.345138	0.688998
Tuberin_pT1462-R-V	0.537815	-0.033207	0.688998
Src_pY416-R-V	0.55044	0.05165	0.701446
14-3-3-zeta-R-V	0.564482	-0.0303451	0.71617
Cyclin-D1-R-V	0.573134	-0.0128064	0.718334
ERCC1-M-V	0.57394	-0.0145176	0.718334
HSP27_pS15-R-N	0.576164	-0.0751489	0.718334
PARP1-R-V	0.570733	-0.0607263	0.718334
G6PD-M-V	0.580684	0.0366644	0.720849
LC3A-B-R-C	0.591984	-0.0304843	0.725495
RPA32_pS4_S8-R-C	0.590483	0.0146753	0.725495
Smad3-R-V	0.588394	-0.0135164	0.725495
HSP70-R-C	0.60372	0.0232122	0.736743
DM-K9-Histone-H3-R-C	0.625738	-0.0116939	0.760391
Rad51-R-V	0.637488	0.0315165	0.771414
Bad_pS112-R-V	0.64448	-0.0255348	0.776612
MDM2-M-N	0.649031	0.186491	0.778837
Nanog-R-N	0.655266	0.0215217	0.779821
Paxillin-R-C	0.654279	-0.0270873	0.779821
53BP1-R-V	0.668654	-0.0184868	0.789373
Lck-R-V	0.668774	0.0271612	0.789373
NF-kB-p65_pS536-R-C	0.677795	0.0136034	0.796755
Glutaminase-R-C	0.682314	0.0215721	0.798807
GATA3-M-V	0.705161	-0.0850232	0.822213
Cyclin-E1-M-V	0.723453	0.00620827	0.836764
YAP_pS127-R-E	0.721001	0.0251419	0.836764
b-Actin-R-C	0.742161	0.0253129	0.842673
IGF1R_pY1135_Y1136-R-V	0.743191	0.00866574	0.842673
Jak2-R-V	0.732358	0.0321893	0.842673
Rab25-R-V	0.7428	-0.0225421	0.842673
TFAM-R-V	0.73876	-0.0346215	0.842673
FAK-R-C	0.746139	0.0161018	0.842698
Rb-M-Q	0.754849	-0.0073051	0.849205
Beclin-G-C	0.762448	-0.00813095	0.854416
Histone-H3-TM-K4-R-N	0.772625	0.111525	0.857227
JNK2-R-C	0.773886	0.0202649	0.857227
Rb_pS807_S811-R-V	0.772639	0.0132927	0.857227
ALDH1A1-R-N	0.788309	0.0347219	0.866538
PRAS40_pT246-R-V	0.78708	-0.0178078	0.866538
Bid-R-C	0.810743	-0.0155972	0.88111
RPA32-T-C	0.808392	-0.0151365	0.88111
Vimentin-M-C	0.804906	0.0165052	0.88111
c-Met-M-Q	0.821328	-0.0123154	0.889257
COG3-R-V	0.836206	-0.0119709	0.901975
4E-BP1_pS65-R-V	0.852481	-0.011497	0.916099
Histone-H3-R-V	0.8608	0.00967345	0.918186
Snail-M-Q	0.858949	0.00545709	0.918186
CXCR4-R-C	0.871985	-0.00449123	0.926685
BAP1-M-V	0.876208	-0.00662769	0.92775
Caspase-8-M-Q	0.880273	-0.00426234	0.928639
ACC_pS79-R-V	0.898836	0.0131194	0.93453
Aurora-B-R-V	0.896218	0.00749586	0.93453
Elk1_pS383-R-C	0.895118	-0.0062427	0.93453
FASN-R-V	0.890051	-0.010921	0.93453
MMP2-R-V	0.906247	0.0041727	0.938846
RSK-R-C	0.912423	-0.00529919	0.941856
Ets-1-R-V	0.932009	0.002561	0.958638
ADAR1-M-V	0.942272	0.00545589	0.963139
HER3-R-V	0.949762	0.00326224	0.963139
MAPK_pT202_Y204-R-V	0.947032	0.00419812	0.963139
PR-R-V	0.948066	0.00414942	0.963139
SHP-2_pY542-R-C	0.961812	0.00233515	0.971936
A-Raf-R-V	0.972526	0.00335093	0.972526
Oct-4-R-N	0.966758	0.00102075	0.972526
PEA-15-R-V	0.969952	0.00210353	0.972526

## Sheet: Supplementary table6
Supplementary Table 6. The possible biological target genes of HSV-1 miR-H16 predicted by miRDB
Target Rank	Target Score	Gene Symbol
1	100	C9orf3
2	100	ATG13
3	100	FRMD8
4	99	MAP3K9
5	99	HMGA1
6	99	CD47
7	99	ERCC6
8	98	NF2
9	98	RNF144B
10	98	CCL22
11	98	MYO1C
12	98	SARM1
13	98	DGKD
14	98	CDK5R2
15	97	CSF1
16	97	RUNX3
17	97	TPPP
18	97	SPATA5
19	97	ZC3H7A
20	97	TOM1L2
21	97	CORO2B
22	97	MPEG1
23	96	ZNF710
24	96	SPTB
25	96	ALDH3B1
26	96	SEZ6
27	96	ITPKB
28	96	KCNG1
29	96	RNF20
30	95	ZNRF1
31	95	H1F0
32	95	TRAPPC9
33	95	KIF1C
34	95	RAB5B
35	95	ARHGAP1
36	95	TADA2B
37	94	SNAP25
38	94	BMPR2
39	94	PPM1A
40	94	RAB11FIP5
41	94	SP140
42	94	VHL
43	94	S100PBP
44	94	ELMO2
45	94	PRKCE
46	94	CAMK2A
47	94	RALY
48	94	RICTOR
49	93	PKLR
50	93	SDC3
51	93	SHANK2
52	93	ARX
53	93	SNX30
54	93	SLC25A42
55	93	BZW1
56	93	IL2RB
57	93	PLAGL2
58	93	ADAM11
59	93	KCNJ4
60	92	NRIP3
61	92	C1orf123
62	92	AGMAT
63	92	TBC1D9B
64	92	HDLBP
65	92	TRAPPC10
66	92	SFXN3
67	92	CPSF7
68	91	ALKBH5
69	91	PHLDB1
70	91	KIF21B
71	91	LASP1
72	91	APCDD1L
73	91	NFX1
74	91	KLHDC10
75	91	THSD7A
76	91	DAG1
77	90	TMEM86A
78	90	MANBAL
79	90	CHKA
80	90	SLC35E2B
81	90	GRIK3
82	90	F11R
83	90	MLLT6
84	90	APAF1
85	90	RBM4B
86	90	BTRC
87	89	MLX
88	89	PDXDC1
89	89	TMCC2
90	89	LONRF1
91	89	LZTS1
92	89	CSNK1G1
93	89	NIPAL4
94	89	FOXL2
95	89	BTG2
96	89	DHX8
97	88	KIAA1432
98	88	PPP1R7
99	88	SETX
100	88	FNBP1
101	88	ZMAT4
102	88	CMC4
103	88	TBC1D13
104	87	LRCH1
105	87	SERPINB1
106	87	FGF9
107	87	TCN2
108	87	TTC9
109	87	TRIM29
110	87	EFR3B
111	87	SLC26A9
112	87	COPS8
113	87	STK10
114	87	PHC3
115	87	LIMD1
116	87	IRGQ
117	87	SMUG1
118	87	LRRN3
119	87	IFFO2
120	86	SDK2
121	86	UGGT1
122	86	MTMR10
123	86	SELPLG
124	86	TRIM66
125	86	GRM4
126	86	FOXP1
127	86	CA12
128	86	ATOH8
129	86	THRAP3
130	86	USP15
131	86	TUSC2
132	86	FBXL20
133	86	ZNF530
134	86	FIBCD1
135	85	CCKBR
136	85	TIAF1
137	85	PPP1R1C
138	85	ASB6
139	85	ACKR2
140	85	LARP1
141	85	ABAT
142	85	PRR5
143	85	GRAMD1B
144	85	IRX6
145	85	EFR3A
146	85	PVRL1
147	84	ADAM19
148	84	MGA
149	84	FA2H
150	84	CYB5RL
151	84	PHF19
152	84	MAPK9
153	84	SEPW1
154	84	HHIPL1
155	84	TRPS1
156	84	C1orf198
157	84	LDLRAP1
158	84	PLAT
159	84	SGTA
160	84	KCNN2
161	84	MIEF1
162	84	MAMSTR
163	84	MVB12B
164	83	RBBP9
165	83	ASH1L
166	83	GRINA
167	83	RAC2
168	83	LRRC55
169	83	RAB15
170	83	EPHA8
171	83	RHOG
172	83	MYO1A
173	83	MTMR1
174	83	PIM2
175	83	ITGA4
176	83	SLC4A8
177	82	STK35
178	82	HELZ2
179	82	DOC2A
180	82	SDCCAG3
181	82	STRADA
182	82	HIP1R
183	82	NKIRAS2
184	82	CD4
185	82	KIAA0513
186	82	TBC1D24
187	82	SHC1
188	82	ZMAT3
189	82	PRKAR2A
190	82	E2F6
191	82	TSPYL5
192	82	ATXN1L
193	82	RFT1
194	82	DTX3L
195	81	PGPEP1
196	81	KCNE4
197	81	MKNK2
198	81	S1PR2
199	81	STMN1
200	81	ABCC3
201	81	SDK1
202	81	CYP3A7-CYP3AP1
203	81	COQ9
204	81	SDHAF2
205	81	SUDS3
206	81	SF3B4
207	81	MOB3B
208	81	ARHGEF39
209	80	FXYD6
210	80	XYLB
211	80	PLEKHM3
212	80	AP1B1
213	80	PHF12
214	80	TBC1D16
215	80	CYP3A7
216	80	SMAD7
217	80	HTT
218	80	CPA4
219	80	PAX9
220	80	C14orf142
221	80	RMND5A
222	80	CNTN2
223	79	FBXO41
224	79	E2F1
225	79	GOSR2
226	79	NANOS2
227	79	DZIP1L
228	79	CCDC92
229	79	CD24
230	79	SLC2A10
231	79	TRABD2B
232	79	USP3
233	79	CD59
234	78	MYO18A
235	78	ATG4C
236	78	PAQR6
237	78	TRMT61A
238	78	TENM4
239	78	ZBTB43
240	78	PAK1
241	78	SRSF2
242	78	NLK
243	78	FEZF2
244	78	ST3GAL1
245	78	TIMP3
246	78	GUCD1
247	77	TMEM248
248	77	GALNT16
249	77	SLC7A5
250	77	FAIM2
251	77	MPC1L
252	77	DDX52
253	77	DCAF7
254	77	FAM160B1
255	77	IGF2
256	77	N4BP1
257	77	SNPH
258	77	GRAP2
259	77	TLX1
260	77	PSG1
261	77	RCAN3
262	77	UNC119B
263	76	TMEM167A
264	76	CBFA2T3
265	76	PDE7A
266	76	DPYSL5
267	76	SEMA4G
268	76	RFFL
269	76	HMMR
270	76	GCC2
271	76	ADD1
272	76	IGF1R
273	76	ELFN2
274	76	DAB2IP
275	76	GPR37L1
276	76	RECQL5
277	76	CLTB
278	76	AREL1
279	76	PIK3CD
280	76	RNF41
281	75	SPRY4
282	75	MAP3K13
283	75	SLC25A4
284	75	TMEM104
285	75	ATP6V0A1
286	75	SNRPE
287	75	ABI2
288	75	COL6A6
289	75	GALNT7
290	75	CCER2
291	75	CNDP2
292	75	KIAA1919
293	74	STAT3
294	74	AMICA1
295	74	SLC9A1
296	74	KLHL6
297	74	CDH11
298	74	DDA1
299	74	TAPT1
300	74	ZNF346
301	74	SALL4
302	74	TMEM52B
303	74	SV2C
304	74	KLF13
305	74	RFX7
306	74	DALRD3
307	74	DNAJC5
308	74	KSR1
309	74	GOLGA1
310	73	YBX2
311	73	BLCAP
312	73	UBFD1
313	73	KLHDC8A
314	73	CHST3
315	73	SDSL
316	73	MTDH
317	73	DCX
318	73	ZDHHC7
319	73	LRCH4
320	73	CDR2L
321	73	SH2D1B
322	73	FOXO1
323	73	ARHGEF9
324	73	ZDHHC22
325	73	TGIF2
326	73	PRR27
327	73	ITPKC
328	73	PSMD2
329	72	ZIX3
330	72	KRT16
331	72	SMG1
332	72	AKAP13
333	72	FGFR1OP
334	72	KLHL25
335	72	CMC2
336	72	RASD2
337	72	NXK3-1
338	72	PPP1R16B
339	72	NRXN2
340	72	CHRD
341	72	ATXN7
342	72	SLC29A3
343	72	LRP4
344	72	MIDN
345	72	ARNT
346	72	SLC38A3
347	72	SFMBT1
348	72	GDPD5
349	72	ZNF35
350	72	MTR
351	72	NRBP1
352	71	UNC5B
353	71	BTF4L4
354	71	XXYLT1
355	71	CNTFR
356	71	TMEM19
357	71	PCP4
358	71	INPP5D
359	71	DICER1
360	71	RERN1
361	71	RTN4RL2
362	71	SLC35E4
363	71	VASH1
364	71	TBC1D30
365	71	MUL1
366	70	DCAF8
367	70	ABR
368	70	C12orf49
369	70	NCR3LG1
370	70	ZNF27S
371	70	RNF157
372	70	LOC100507656
373	70	NOTCH2
374	70	NAGA
375	70	FAM107A
376	70	MED1
377	70	TMEM51
378	70	ANKS1A
379	70	RHOF
380	69	UCKL1
381	69	PRRC2C
382	69	KIAA1147
383	69	SRXN1
384	69	LPCAT1
385	69	EFNA3
386	69	KIAA0247
387	69	UNKL
388	69	PACS1
389	69	PDCD10
390	69	CSPG4
391	69	CYP3A4
392	69	POLB3R
393	69	PTGIS
394	69	CDH24
395	69	CLASP2
396	69	KCNJ5
397	68	ASB16
398	68	CNST
399	68	ERC1
400	68	PAQR5
401	68	TICAM2
402	68	STPG2
403	68	YPEL2
404	68	PDE4A
405	68	KIAA1751
406	68	MDM4
407	68	LHFPL5
408	68	SLC4A1
409	68	ARRB1
410	68	B3GAT1
411	68	HIF1AN
412	68	CD22
413	68	NDUFAF4
414	68	CAPN1
415	68	CNNM3
416	67	CARM1
417	67	SLC35E2
418	67	KLHL31
419	67	SKIL
420	67	LETM1
421	67	SYNE3
422	67	DUSP18
423	67	INPP4A
424	67	RAPGEFL1
425	67	KCNB1
426	67	TTYH3
427	67	LMLN
428	67	PHC2
429	67	PDGFRA
430	67	CDC20B
431	67	ORAOV1
432	67	THOC2
433	66	FAM196A
434	66	MBD6
435	66	ZFYVE1
436	66	RANBP10
437	66	MGAT3
438	66	WNK1
439	66	HAP1
440	66	FCER2
441	66	ASAP2
442	66	SLC6A7
443	66	CAPN5
444	66	DOK2
445	66	RAB40C
446	66	ANKRD26
447	66	DENND1A
448	66	CEP350
449	66	HAUS5
450	66	ZNF592
451	66	DFNB31
452	66	ABHD17B
453	66	P2RY2
454	65	FIGNL2
455	65	RNPEPL1
456	65	RAB8A
457	65	CARHSP1
458	65	LOC102724985
459	65	TERF2
460	65	SOX3
461	65	OLR1
462	65	SLC7A1
463	65	TSKU
464	65	CDRT1
465	65	SLC25A17
466	65	ANF587
467	65	UMPS
468	65	KIAA0430
469	65	THAP11
470	65	PDPR
471	65	TAGLN3
472	65	KCNF1
473	65	FAM53C
474	65	CPSF4
475	65	DDX18
476	65	REEP1
477	65	CPLX1
478	64	PSMD11
479	64	POFUT1
480	64	KCND3
481	64	HEPHL1
482	64	LIN28A
483	64	KCNA7
484	64	DAPK2
485	64	DLX3
486	64	LRRC25
487	64	LCN10
488	64	LZTS3
489	64	CACUL1
490	64	SEPT3
491	64	KREMEN1
492	64	SMTNL2
493	64	FLOT2
494	64	AGRN
495	63	VPS33A
496	63	BNIPL
497	63	RRAS
498	63	RALGAPB
499	63	ATP1B2
500	63	ZNF850
501	63	CHST1
502	63	HMBOX1
503	63	OXTR
504	63	CRTC1
505	63	KRT77
506	63	STARD3
507	63	TYW1
508	63	AKAP12
509	63	RCSD1
510	63	MACROD2
511	63	NUTF2
512	63	ADAMTS18
513	63	RPS6KA5
514	62	SLC8A1
515	62	COL4A6
516	62	MARCKSL1
517	62	SLC4A9
518	62	NUMBL
519	62	KRT75
520	62	WDR26
521	62	AKAP10
522	62	CHP1
523	62	DPT
524	62	AKNA
525	62	CBL
526	62	PKNOX1
527	62	ZNF395
528	62	CHD3
529	62	MLF2
530	62	FAM60A
531	62	NAV2
532	62	VANGL2
533	62	REPIN1
534	62	PCBD2
535	62	KIF2B
536	62	C1orf95
537	61	MTCP1
538	61	SPRR4
539	61	ZNF384
540	61	TMED7-TICAM2
541	61	DSCR3
542	61	HECTD4
543	61	MGRN1
544	61	MAPK13
545	61	MED20
546	61	FBXO44
547	61	SMARCC2
548	61	SLC24A4
549	61	YWHAQ
550	61	FAM45A
551	61	ITGB8
552	61	EN2
553	61	KCNA6
554	61	FBLIM1
555	61	STAT5A
556	61	IKBKE
557	60	APOA5
558	60	ASXL3
559	60	FAM160B2
560	60	TMEM241
561	60	POLR2J2
562	60	SERF2
563	60	TNPO1
564	60	LRRN2
565	60	SP6
566	60	CDCP1
567	60	IGSF3
568	60	EPN2
569	60	ZNF442
570	60	ZNF365
571	60	UVSSA
572	60	CACNB1
573	60	STOX2
574	60	SCYL2
575	60	URM1
576	60	KCTD20
577	60	NOS1
578	60	EPB41
579	60	MICU1
580	60	KIAA2018
581	60	PDE6B
582	60	NLRX1
583	60	FARP1
584	59	SLC12A7
585	59	SH2D2A
586	59	CD164L2
587	59	POTEM
588	59	TSPAN18
589	59	DUSP16
590	59	PPM1K
591	59	PPM1H
592	59	CASP14
593	59	TP53I11
594	59	TPBGL
595	59	TPSB2
596	59	SNRPD3
597	58	PVALB
598	58	FAM227A
599	58	LFNG
600	58	APOBEC3F
601	58	RBMS2
602	58	LYG2
603	58	KNOP1
604	58	TMEM110
605	58	TIA1
606	58	C10orf99
607	58	loc100996318
608	58	FANCF
609	58	ABLIM1
610	58	CDH3
611	58	ZNF385C
612	58	VTI1A
613	58	SNX33
614	58	EFNB1
615	58	ALDH4A1
616	58	PRPSAP1
617	58	ING5
618	58	TK2
619	57	CYP26B1
620	57	ADORA2A
621	57	ZDHHC3
622	57	BLOC1S3
623	57	MROH9
624	57	CCDC141
625	57	SEP15
626	57	TACR1
627	57	TPSAB1
628	57	MLXIP
629	57	PLA2G2F
630	57	NYAP1
631	57	C10orf90
632	57	CLIP4
633	56	SYNPO2L
634	56	PALMD
635	56	RGS6
636	56	UBE2O
637	56	ARFRP1
638	56	C15orf57
639	56	LAPTM5
640	56	TNS1
641	56	OTUD7B
642	56	TLR1
643	56	KDM5C
644	56	CDK6
645	56	DPF2
646	56	ZNF512
647	56	MAPK11
648	56	PLXNA4
649	56	ALX4
650	56	ADAMTS2
651	56	SPOCK2
652	56	PALM
653	56	PRNP
654	56	CRELD1
655	56	C2CD2L
656	56	C3orf33
657	56	PRRC2B
658	56	KRT38
659	56	CDC42BPB
660	55	RALGAPA2
661	55	APOLD1
662	55	ADARB1
663	55	CRAMP1
664	55	FBXO42
665	55	STK40
666	55	RHOC
667	55	PDGFRB
668	55	DNAJC16
669	55	CAMTA2
670	55	SOWAHD
671	55	SLC13A5
672	55	TNFSF9
673	55	RASL10B
674	55	MCC
675	55	GNAO1
676	55	AMIGO3
677	55	MECP2
678	55	CLK2
679	55	SNX21
680	55	AMIGO1
681	55	NECAB3
682	55	KIAA1045
683	55	AHCYL2
684	55	MYD88
685	55	NACC2
686	55	EXOSC1
687	55	LOC400682
688	55	LSM14A
689	55	ZNF277
690	55	NKD1
691	54	PDX1
692	54	MTFMT
693	54	TNFAIP1
694	54	PRKAB2
695	54	CDHR1
696	54	FOSL1
697	54	MCAT
698	54	SMAD4
699	54	CELSR3
700	54	RBBP4
701	54	GRWD1
702	54	MEX3A
703	54	ZNF780A
704	54	THEM6
705	54	HLA-DQA1
706	54	ZC3H12D
707	54	TMEM108
708	54	AKAP8
709	54	TAF8
710	54	N4BP3
711	54	BMP2
712	54	FAM155B
713	54	IQSEC3
714	54	ZEB2
715	54	KMT2B
716	54	ARGFX
717	54	ZNF527
718	53	RPF1
719	53	DDX6
720	53	NLGN1
721	53	ADAMTSL5
722	53	HIF3A
723	53	FLCN
724	53	ZKSCAN3
725	53	TBC1D22A
726	53	SBNO1
727	53	BEND4
728	53	RIMS3
729	53	PITPNA
730	53	PITPNB
731	53	C1orf172
732	53	KLHL21
733	53	LOC102724200
734	53	PIP5K1C
735	53	ZNF500
736	53	C11orf68
737	53	SIN3A
738	53	TNFAIP8L1
739	53	ARL2BP
740	53	KIAA1161
741	53	RNF216
742	53	MCCC2
743	53	LRRC61
744	53	OAS3
745	53	RACGAP1
746	53	ORC2
747	52	DDX55
748	52	BRPF3
749	52	EFCAB2
750	52	FAM167A
751	52	OAS2
752	52	SYT2
753	52	SPATA31D3
754	52	SCIMP
755	52	MTHFR
756	52	CTNND1
757	52	CYP8B1
758	52	IL1RAPL1
759	52	FARS2
760	52	HAAO
761	52	PSME3
762	52	TFEC
763	52	RINL
764	52	ITFG3
765	52	POLR2J3
766	52	RBM12
767	52	TIAM1
768	52	EVI5L
769	52	CXCL16
770	52	ANTXR2
771	51	PLEKHF1
772	51	SREBF1
773	51	PDDC1
774	51	COLQ
775	51	PLCD3
776	51	LUC7L
777	51	TMEM151B
778	51	SETDB2
779	51	SCAP
780	51	PLEKHG5
781	51	LRRC1
782	51	ZNF212
783	51	BACH1
784	51	TMEM185A
785	51	KCNQ4
786	51	LSMEM2
787	51	FOXJ1
788	51	ARIH2
789	51	C1QL2
790	51	TCEAL2
791	51	SLC7A1
792	51	PLP2
793	51	IRS2
794	51	CMKLR1
795	51	GFOD2
796	51	OR10AD1
797	51	CLOCK
798	51	SOAT1
799	51	IL23A
800	51	TRAPPC2
801	51	TEDDM1
802	50	CLMN
803	50	BRD4
804	50	OVOL1
805	50	CACNA1C
806	50	OR7D2
807	50	APBB2
808	50	XIRP1
809	50	DIAPH1
810	50	OAF
811	50	TSTD2
812	50	FAM124B
813	50	MANEA
814	50	PARP16
815	50	OR7A5
816	50	FBXW8
817	50	JAG2
818	50	RAB2A
819	50	OTUD1
820	50	MGAT1
821	50	SIRPB1
822	50	AP2M1
823	50	FNBP1L
824	50	FRMPD2
825	50	SLC13A3

## Sheet: Supplementary table7
Supplementary Table 7. The possible biological target genes of HSV-1 miR-H16 predicted by TargetScan
Target gene	Gene name	Conserved sites
		total	8mer	7mer-m8	7mer-1A
ACVR2B	activin A receptor, type IIB	2	1	1	0
CBL	Cas-Br-M (murine) ecotropic retroviral transforming sequence	2	1	1	0
SLC12A6	solute carrier family 12 (potassium/chloride transporters), member 6	2	0	2	0
ACADSB	acyl-Coenzyme A dehydrogenase, short/branched chain	1	1	0	0
ACIN1	apoptotic chromatin condensation inducer 1	1	1	0	0
ANGPTL2	angiopoietin-like 2	1	1	0	0
ARNT	aryl hydrocarbon receptor nuclear translocator	1	1	0	0
ASH1L	ash1 (absent, small, or homeotic)-like (Drosophila)	1	1	0	0
BAIAP2	BAI1-associated protein 2	1	1	0	0
BBC3	BCL2 binding component 3	1	1	0	0
C15orf23	chromosome 15 open reading frame 23	1	1	0	0
C1orf123	chromosome 1 open reading frame 123	1	1	0	0
C22orf13	chromosome 22 open reading frame 13	1	1	0	0
C5orf25	chromosome 5 open reading frame 25	1	1	0	0
C7orf51	chromosome 7 open reading frame 51	1	1	0	0
CASZ1	castor zinc finger 1	1	1	0	0
CCDC93	coiled-coil domain containing 93	1	1	0	0
CEP350	centrosomal protein 350kDa	1	1	0	0
CLTB	clathrin, light chain (Lcb)	1	1	0	0
CNTD2	cyclin N-terminal domain containing 2	1	1	0	0
COPS8	COP9 constitutive photomorphogenic homolog subunit 8 (Arabidopsis)	1	1	0	0
COQ9	coenzyme Q9 homolog (S. cerevisiae)	1	1	0	0
CTDSPL	CTD (carboxy-terminal domain, RNA polymerase II, polypeptide A) small phosphatase-like	1	1	0	0
CTSC	cathepsin C	1	1	0	0
CTTNBP2NL	CTTNBP2 N-terminal like	1	1	0	0
DCP2	DCP2 decapping enzyme homolog (S. cerevisiae)	1	1	0	0
DCX	doublecortex; lissencephaly, X-linked (doublecortin)	1	1	0	0
DDX6	DEAD (Asp-Glu-Ala-Asp) box polypeptide 6	1	1	0	0
DNAJC16	DnaJ (Hsp40) homolog, subfamily C, member 16	1	1	0	0
DVL3	dishevelled, dsh homolog 3 (Drosophila)	1	1	0	0
DYRK1B	dual-specificity tyrosine-(Y)-phosphorylation regulated kinase 1B	1	1	0	0
FA2H	fatty acid 2-hydroxylase	1	1	0	0
FAM13A1	family with sequence similarity 13, member A1	1	1	0	0
FOSL1	FOS-like antigen 1	1	1	0	0
FOXP4	forkhead box P4	1	1	0	0
FZD1	frizzled homolog 1 (Drosophila)	1	1	0	0
GALNT7	UDP-N-acetyl-alpha-D-galactosamine:polypeptide N-acetylgalactosaminyltransferase 7 (GalNAc-T7)	1	1	0	0
IFT52	intraflagellar transport 52 homolog (Chlamydomonas)	1	1	0	0
IGF2	insulin-like growth factor 2 (somatomedin A)	1	1	0	0
IRF2BP1	interferon regulatory factor 2 binding protein 1	1	1	0	0
KCNJ14	potassium inwardly-rectifying channel, subfamily J, member 14	1	1	0	0
KIAA0265	KIAA0265 protein	1	1	0	0
KRT77	keratin 77	1	1	0	0
LARP1	La ribonucleoprotein domain family, member 1	1	1	0	0
LONRF1	LON peptidase N-terminal domain and ring finger 1	1	1	0	0
LPCAT1	lysophosphatidylcholine acyltransferase 1	1	1	0	0
MARK4	MAP/microtubule affinity-regulating kinase 4	1	1	0	0
MLLT6	myeloid/lymphoid or mixed-lineage leukemia (trithorax homolog, Drosophila); translocated to, 6	1	1	0	0
MTHFR	5,10-methylenetetrahydrofolate reductase (NADPH)	1	1	0	0
NAGA	N-acetylgalactosaminidase, alpha-	1	1	0	0
NFX1	nuclear transcription factor, X-box binding 1	1	1	0	0
NGFR	nerve growth factor receptor (TNFR superfamily, member 16)	1	1	0	0
NMUR1	neuromedin U receptor 1	1	1	0	0
NUMBL	numb homolog (Drosophila)-like	1	1	0	0
PDCD10	programmed cell death 10	1	1	0	0
PDE4A	phosphodiesterase 4A, cAMP-specific (phosphodiesterase E2 dunce homolog, Drosophila)	1	1	0	0
PSME3	proteasome (prosome, macropain) activator subunit 3 (PA28 gamma; Ki)	1	1	0	0
PTMS	parathymosin	1	1	0	0
PTPRJ	protein tyrosine phosphatase, receptor type, J	1	1	0	0
RAB5B	RAB5B, member RAS oncogene family	1	1	0	0
RICTOR	rapamycin-insensitive companion of mTOR	1	1	0	0
RIMBP2	RIMS binding protein 2	1	1	0	0
RND2	Rho family GTPase 2	1	1	0	0
RNF122	ring finger protein 122	1	1	0	0
RNF20	ring finger protein 20	1	1	0	0
SEMA3G	sema domain, immunoglobulin domain (Ig), short basic domain, secreted, (semaphorin) 3G	1	1	0	0
SERTAD3	SERTA domain containing 3	1	1	0	0
SHANK2	SH3 and multiple ankyrin repeat domains 2	1	1	0	0
SHANK3	SH3 and multiple ankyrin repeat domains 3	1	1	0	0
SHE	Src homology 2 domain containing E	1	1	0	0
SLC25A14	solute carrier family 25 (mitochondrial carrier, brain), member 14	1	1	0	0
SLC30A2	solute carrier family 30 (zinc transporter), member 2	1	1	0	0
SLC38A3	solute carrier family 38, member 3	1	1	0	0
SLC4A9	solute carrier family 4, sodium bicarbonate cotransporter, member 9	1	1	0	0
SMAD7	SMAD family member 7	1	1	0	0
SMG1	PI-3-kinase-related kinase SMG-1	1	1	0	0
SOCS3	suppressor of cytokine signaling 3	1	1	0	0
SP7	Sp7 transcription factor	1	1	0	0
SPRY1	sprouty homolog 1, antagonist of FGF signaling (Drosophila)	1	1	0	0
STMN1	stathmin 1/oncoprotein 18	1	1	0	0
SYT11	synaptotagmin XI	1	1	0	0
TAF8	TAF8 RNA polymerase II, TATA box binding protein (TBP)-associated factor, 43kDa	1	1	0	0
TET3	tet oncogene family member 3	1	1	0	0
TGIF2	TGFB-induced factor homeobox 2	1	1	0	0
TK2	thymidine kinase 2, mitochondrial	1	1	0	0
TRPV3	transient receptor potential cation channel, subfamily V, member 3	1	1	0	0
TSHZ2	teashirt zinc finger homeobox 2	1	1	0	0
VANGL2	vang-like 2 (van gogh, Drosophila)	1	1	0	0
ZC3H7A	zinc finger CCCH-type containing 7A	1	1	0	0
ZDHHC22	zinc finger, DHHC-type containing 22	1	1	0	0
ZNF275	zinc finger protein 275	1	1	0	0
BMPR2	bone morphogenetic protein receptor, type II (serine/threonine kinase)	2	0	1	1
CDC42SE1	CDC42 small effector 1	2	0	1	1
NLK	nemo-like kinase	2	0	1	1
RANBP2	RAN binding protein 2	2	0	1	1
C10orf132	chromosome 10 open reading frame 132	2	0	0	2
ARHGAP1	Rho GTPase activating protein 1	1	0	1	0
ATP4A	ATPase, H+/K+ exchanging, alpha polypeptide	1	0	1	0
BRUNOL6	bruno-like 6, RNA binding protein (Drosophila)	1	0	1	0
BZW1	basic leucine zipper and W2 domains 1	1	0	1	0
C14orf28	chromosome 14 open reading frame 28	1	0	1	0
C14orf43	chromosome 14 open reading frame 43	1	0	1	0
C15orf37	chromosome 15 open reading frame 37	1	0	1	0
C19orf47	chromosome 19 open reading frame 47	1	0	1	0
C2orf24	chromosome 2 open reading frame 24	1	0	1	0
C9orf72	chromosome 9 open reading frame 72	1	0	1	0
CACNB1	calcium channel, voltage-dependent, beta 1 subunit	1	0	1	0
CACNB3	calcium channel, voltage-dependent, beta 3 subunit	1	0	1	0
CAPN1	calpain 1, (mu/I) large subunit	1	0	1	0
CAPN5	calpain 5	1	0	1	0
CPLX1	complexin 1	1	0	1	0
CPSF4	cleavage and polyadenylation specific factor 4, 30kDa	1	0	1	0
CRELD1	cysteine-rich with EGF-like domains 1	1	0	1	0
CTNND1	catenin (cadherin-associated protein), delta 1	1	0	1	0
DIAPH1	diaphanous homolog 1 (Drosophila)	1	0	1	0
DLX3	distal-less homeobox 3	1	0	1	0
DOCK3	dedicator of cytokinesis 3	1	0	1	0
DPYSL5	dihydropyrimidinase-like 5	1	0	1	0
EFNB1	ephrin-B1	1	0	1	0
EMR4P	egf-like module containing, mucin-like, hormone receptor-like 4 pseudogene	1	0	1	0
FAM155B	family with sequence similarity 155, member B	1	0	1	0
FAM160B1	family with sequence similarity 160, member B1	1	0	1	0
FAM178A	family with sequence similarity 178, member A	1	0	1	0
FGF9	fibroblast growth factor 9 (glia-activating factor)	1	0	1	0
FLJ37078	hypothetical protein FLJ37078	1	0	1	0
FNBP1	formin binding protein 1	1	0	1	0
FUBP1	far upstream element (FUSE) binding protein 1	1	0	1	0
FZD5	frizzled homolog 5 (Drosophila)	1	0	1	0
GEMIN7	gem (nuclear organelle) associated protein 7	1	0	1	0
GLP1R	glucagon-like peptide 1 receptor	1	0	1	0
GNAI2	guanine nucleotide binding protein (G protein), alpha inhibiting activity polypeptide 2	1	0	1	0
GRIK3	glutamate receptor, ionotropic, kainate 3	1	0	1	0
HEMK1	HemK methyltransferase family member 1	1	0	1	0
HIF1AN	hypoxia-inducible factor 1, alpha subunit inhibitor	1	0	1	0
HOMEZ	homeobox and leucine zipper encoding	1	0	1	0
HOXC6	homeobox C6	1	0	1	0
IKBKE	inhibitor of kappa light polypeptide gene enhancer in B-cells, kinase epsilon	1	0	1	0
JARID1C	jumonji, AT rich interactive domain 1C	1	0	1	0
KCNN2	potassium intermediate/small conductance calcium-activated channel, subfamily N, member 2	1	0	1	0
KIAA1522	KIAA1522	1	0	1	0
KIF1C	kinesin family member 1C	1	0	1	0
KIF21B	kinesin family member 21B	1	0	1	0
KREMEN1	kringle containing transmembrane protein 1	1	0	1	0
LBH	limb bud and heart development homolog (mouse)	1	0	1	0
LRRC1	leucine rich repeat containing 1	1	0	1	0
LRRN3	leucine rich repeat neuronal 3	1	0	1	0
LYK5	protein kinase LYK5	1	0	1	0
MANBAL	mannosidase, beta A, lysosomal-like	1	0	1	0
MAP3K3	mitogen-activated protein kinase kinase kinase 3	1	0	1	0
MBD6	methyl-CpG binding domain protein 6	1	0	1	0
MCM8	minichromosome maintenance complex component 8	1	0	1	0
MEX3A	mex-3 homolog A (C. elegans)	1	0	1	0
PAX5	paired box 5	1	0	1	0
PDPK1	3-phosphoinositide dependent protein kinase-1	1	0	1	0
PFKFB2	6-phosphofructo-2-kinase/fructose-2,6-biphosphatase 2	1	0	1	0
PHOSPHO1	phosphatase, orphan 1	1	0	1	0
PRKAB2	protein kinase, AMP-activated, beta 2 non-catalytic subunit	1	0	1	0
PRKCE	protein kinase C, epsilon	1	0	1	0
PUNC	putative neuronal cell adhesion molecule	1	0	1	0
PVALB	parvalbumin	1	0	1	0
RAB2A	RAB2A, member RAS oncogene family	1	0	1	0
RAB40C	RAB40C, member RAS oncogene family	1	0	1	0
RHOG	ras homolog gene family, member G (rho G)	1	0	1	0
RIMS4	regulating synaptic membrane exocytosis 4	1	0	1	0
RNF157	ring finger protein 157	1	0	1	0
RPL29	ribosomal protein L29	1	0	1	0
SAP30BP	SAP30 binding protein	1	0	1	0
SENP5	SUMO1/sentrin specific peptidase 5	1	0	1	0
SERF2	small EDRK-rich factor 2	1	0	1	0
SETX	senataxin	1	0	1	0
SEZ6	seizure related 6 homolog (mouse)	1	0	1	0
SH2D2A	SH2 domain protein 2A	1	0	1	0
SH3BP4	SH3-domain binding protein 4	1	0	1	0
SHC1	SHC (Src homology 2 domain containing) transforming protein 1	1	0	1	0
SLC24A6	solute carrier family 24 (sodium/potassium/calcium exchanger), member 6	1	0	1	0
SLC36A1	solute carrier family 36 (proton/amino acid symporter), member 1	1	0	1	0
SLC7A8	solute carrier family 7 (cationic amino acid transporter, y+ system), member 8	1	0	1	0
SMG6	Smg-6 homolog, nonsense mediated mRNA decay factor (C. elegans)	1	0	1	0
SMURF1	SMAD specific E3 ubiquitin protein ligase 1	1	0	1	0
SNIP	SNAP25-interacting protein	1	0	1	0
SNX11	sorting nexin 11	1	0	1	0
SPATA2	spermatogenesis associated 2	1	0	1	0
ST7	suppression of tumorigenicity 7	1	0	1	0
TEX261	testis expressed 261	1	0	1	0
THSD7B	thrombospondin, type I, domain containing 7B	1	0	1	0
TRIM68	tripartite motif-containing 68	1	0	1	0
TTN	titin	1	0	1	0
TUSC2	tumor suppressor candidate 2	1	0	1	0
UBOX5	U-box domain containing 5	1	0	1	0
UPK1A	uroplakin 1A	1	0	1	0
USP15	ubiquitin specific peptidase 15	1	0	1	0
WDR68	WD repeat domain 68	1	0	1	0
WNK1	WNK lysine deficient protein kinase 1	1	0	1	0
ZNF354A	zinc finger protein 354A	1	0	1	0
ZNF618	zinc finger protein 618	1	0	1	0
ANKRD1	ankyrin repeat domain 1 (cardiac muscle)	1	0	0	1
ANKRD52	ankyrin repeat domain 52	1	0	0	1
AP2B1	adaptor-related protein complex 2, beta 1 subunit	1	0	0	1
ARHGAP28	Rho GTPase activating protein 28	1	0	0	1
ARIH2	ariadne homolog 2 (Drosophila)	1	0	0	1
ATP1B4	ATPase, (Na+)/K+ transporting, beta 4 polypeptide	1	0	0	1
ATP2B4	ATPase, Ca++ transporting, plasma membrane 4	1	0	0	1
ATP9A	ATPase, class II, type 9A	1	0	0	1
BAHD1	bromo adjacent homology domain containing 1	1	0	0	1
BBS1	Bardet-Biedl syndrome 1	1	0	0	1
C20orf160	chromosome 20 open reading frame 160	1	0	0	1
C3orf45	chromosome 3 open reading frame 45	1	0	0	1
CAPN6	calpain 6	1	0	0	1
CCDC6	coiled-coil domain containing 6	1	0	0	1
CPEB4	cytoplasmic polyadenylation element binding protein 4	1	0	0	1
DMD	dystrophin (muscular dystrophy, Duchenne and Becker types)	1	0	0	1
DOCK5	dedicator of cytokinesis 5	1	0	0	1
ELL2	elongation factor, RNA polymerase II, 2	1	0	0	1
FBXO33	F-box protein 33	1	0	0	1
FRMD4A	FERM domain containing 4A	1	0	0	1
GNS	glucosamine (N-acetyl)-6-sulfatase (Sanfilippo disease IIID)	1	0	0	1
GPRIN1	G protein regulated inducer of neurite outgrowth 1	1	0	0	1
GPT2	glutamic pyruvate transaminase (alanine aminotransferase) 2	1	0	0	1
HPS5	Hermansky-Pudlak syndrome 5	1	0	0	1
HTRA2	HtrA serine peptidase 2	1	0	0	1
INSL3	insulin-like 3 (Leydig cell)	1	0	0	1
LOC116236	hypothetical protein LOC116236	1	0	0	1
LPHN1	latrophilin 1	1	0	0	1
LRFN5	leucine rich repeat and fibronectin type III domain containing 5	1	0	0	1
MAF	v-maf musculoaponeurotic fibrosarcoma oncogene homolog (avian)	1	0	0	1
MLLT1	myeloid/lymphoid or mixed-lineage leukemia (trithorax homolog, Drosophila); translocated to, 1	1	0	0	1
MON2	MON2 homolog (S. cerevisiae)	1	0	0	1
NAPA	N-ethylmaleimide-sensitive factor attachment protein, alpha	1	0	0	1
NEK4	NIMA (never in mitosis gene a)-related kinase 4	1	0	0	1
NRIP1	nuclear receptor interacting protein 1	1	0	0	1
NRK	Nik related kinase	1	0	0	1
PALM2	paralemmin 2	1	0	0	1
PHC3	polyhomeotic homolog 3 (Drosophila)	1	0	0	1
PPP1R9A	protein phosphatase 1, regulatory (inhibitor) subunit 9A	1	0	0	1
RABEP2	rabaptin, RAB GTPase binding effector protein 2	1	0	0	1
RANBP10	RAN binding protein 10	1	0	0	1
SCN3B	sodium channel, voltage-gated, type III, beta	1	0	0	1
SERPINA5	serpin peptidase inhibitor, clade A (alpha-1 antiproteinase, antitrypsin), member 5	1	0	0	1
SF3A1	splicing factor 3a, subunit 1, 120kDa	1	0	0	1
SLC7A6	solute carrier family 7 (cationic amino acid transporter, y+ system), member 6	1	0	0	1
SNX1	sorting nexin 1	1	0	0	1
TANC2	tetratricopeptide repeat, ankyrin repeat and coiled-coil containing 2	1	0	0	1
TAT	tyrosine aminotransferase	1	0	0	1
THAP2	THAP domain containing, apoptosis associated protein 2	1	0	0	1
TLK2	tousled-like kinase 2	1	0	0	1
TTC9	tetratricopeptide repeat domain 9	1	0	0	1
WASF2	WAS protein family, member 2	1	0	0	1
WIPF2	WAS/WASL interacting protein family, member 2	1	0	0	1
WIT1	Wilms tumor upstream neighbor 1	1	0	0	1
XYLT1	xylosyltransferase I	1	0	0	1
